# Supplementary material
Source: PubMed Central journal article supplement (PMC4344144)
Supplement: rspb20142284supp2.pdf [file rspb20142284supp2.pdf]

## Supplementary results

**Table S1.** Summary of species identity classification performance on the basis of either the perceptual dimensions of overall face pattern (eigenface scores), nose-spot appearance or eyebrow patch appearance. For each signal the performance of each individual component was calculated first, then up to two multicomponent models were calculated. The first ‘top predictors’ multicomponent model uses the three best performing components (highest % above chance classification performance). The second ‘all sig predictors’ multicomponent model includes all components that are significant predictors in the single component models. Percentage correct is the mean percentage of cross-validated cases classified correctly after 100 test iterations. The percentage chance column shows the mean percentage correct classification performance of 1000 random nested permutations of the test data.

|                                                                  |                                 | % correct           | % chance | % above chance | <i>P</i> |       |
|------------------------------------------------------------------|---------------------------------|---------------------|----------|----------------|----------|-------|
| <b>Eigenface scores</b><br>10 species, 99 individuals, 490 cases | eigenface 1                     | 40.17               | 11.55    | 247.85         | 0.001    |       |
|                                                                  | eigenface 2                     | 38.34               | 11.63    | 229.61         | 0.001    |       |
|                                                                  | eigenface 3                     | 28.53               | 11.61    | 145.67         | 0.001    |       |
|                                                                  | eigenface 4                     | 35.12               | 11.63    | 201.86         | 0.001    |       |
|                                                                  | eigenface 5                     | 29.68               | 11.41    | 160.03         | 0.001    |       |
|                                                                  | top predictors                  | eigenface 1, 2 & 4  | 77.19    | 13.60          | 467.47   | 0.001 |
|                                                                  | all sig predictors              | eigenface 1-5       | 81.47    | 15.02          | 442.61   | 0.001 |
| <b>nose-spots</b><br>4 species, 47 individuals, 230 cases        | shape PC1                       | 40.40               | 27.22    | 48.45          | 0.095    |       |
|                                                                  | shape PC2                       | 40.72               | 26.82    | 51.84          | 0.078    |       |
|                                                                  | shape PC3                       | 56.11               | 27.42    | 104.61         | 0.004    |       |
|                                                                  | shape PC4                       | 32.70               | 26.73    | 22.36          | 0.231    |       |
|                                                                  | shape PC5                       | 46.35               | 27.55    | 68.23          | 0.015    |       |
|                                                                  | R/G                             | 63.03               | 28.66    | 119.90         | 0.001    |       |
|                                                                  | B/Y                             | 53.22               | 27.75    | 91.77          | 0.005    |       |
|                                                                  | luminance                       | 30.70               | 27.24    | 12.71          | 0.356    |       |
|                                                                  | area                            | 60.58               | 28.17    | 115.02         | 0.001    |       |
|                                                                  | top predictors                  | R/G, B/Y, area      | 78.73    | 30.91          | 154.69   | 0.001 |
| all sig predictors                                               | shape PCs 2 & 5, R/G, B/Y, area | 88.65               | 32.58    | 172.09         | 0.001    |       |
| <b>eyebrow patches</b><br>4 species, 38 individuals, 188 cases   | shape PC1                       | 34.74               | 26.51    | 31.07          | 0.27     |       |
|                                                                  | shape PC2                       | 31.02               | 24.77    | 25.23          | 0.273    |       |
|                                                                  | shape PC3                       | 38.02               | 27.07    | 40.45          | 0.1      |       |
|                                                                  | shape PC4                       | 30.71               | 27.82    | 10.39          | 0.358    |       |
|                                                                  | shape PC5                       | 28.16               | 25.93    | 8.60           | 0.367    |       |
|                                                                  | R/G                             | 64.11               | 27.53    | 132.84         | 0.001    |       |
|                                                                  | B/Y                             | 51.34               | 27.83    | 84.49          | 0.011    |       |
|                                                                  | luminance                       | 24.80               | 27.62    | -10.21         | 0.557    |       |
|                                                                  | area                            | 37.71               | 27.11    | 39.12          | 0.116    |       |
|                                                                  | top predictors                  | shape PC3, R/G, B/Y | 65.42    | 29.73          | 120.07   | 0.001 |
|                                                                  | all sig predictors              | R/G, B/Y            | 64.84    | 28.08          | 130.87   | 0.001 |

**Table S2.** Sex identity classification performance from eigenface scores.

|                          |                | % correct          | % chance | % above chance | <i>P</i> |
|--------------------------|----------------|--------------------|----------|----------------|----------|
| <i>C. ascanius</i>       | eigenface 1    | 56.56              | 52.95    | 6.82           | 0.358    |
| 12 individuals, 56 cases | eigenface 2    | 38.88              | 54.50    | -28.66         | 0.78     |
|                          | eigenface 3    | 54.81              | 50.91    | 7.66           | 0.455    |
|                          | eigenface 4    | 56.25              | 50.90    | 10.51          | 0.452    |
|                          | eigenface 5    | 40.31              | 53.36    | -24.45         | 0.742    |
|                          | top predictors | eigenface 1, 3 & 4 | 42.67    | 63.28          | -32.57   |
| all sig predictors       | none           |                    |          |                |          |
| <i>C. mona</i>           | eigenface 1    | 46.38              | 56.16    | -17.41         | 0.736    |
| 13 individuals, 62 cases | eigenface 2    | 56.96              | 55.52    | 2.59           | 0.491    |
|                          | eigenface 3    | 54.62              | 55.15    | -0.96          | 0.484    |
|                          | eigenface 4    | 51.69              | 51.23    | 0.90           | 0.493    |
|                          | eigenface 5    | 48.58              | 54.74    | -11.26         | 0.713    |
|                          | top predictors | eigenface 2, 3 & 4 | 55.93    | 57.07          | -2.01    |
| all sig predictors       | none           |                    |          |                |          |
| <i>C. nictitans</i>      | eigenface 1    | 52.42              | 52.31    | 0.21           | 0.496    |
| 18 individuals, 84 cases | eigenface 2    | 46.82              | 51.32    | -8.77          | 0.634    |
|                          | eigenface 3    | 62.04              | 52.85    | 17.41          | 0.249    |
|                          | eigenface 4    | 49.98              | 51.44    | -2.84          | 0.557    |
|                          | eigenface 5    | 51.42              | 52.10    | -1.31          | 0.522    |
|                          | top predictors | eigenface 1 & 3    | 55.10    | 55.06          | 0.07     |
| all sig predictors       | none           |                    |          |                |          |

**Table S3.** Sex identity classification performance from nose-spots.

|                          |                    | % correct                  | % chance | % above chance | <i>P</i> |      |
|--------------------------|--------------------|----------------------------|----------|----------------|----------|------|
| <i>C. nictitans</i>      | shape PC1          | 44.93                      | 52.32    | -14.13         | 0.745    |      |
| 18 individuals, 84 cases | shape PC2          | 50.45                      | 53.09    | -4.97          | 0.553    |      |
|                          | shape PC3          | 43.02                      | 50.32    | -14.50         | 0.734    |      |
|                          | shape PC4          | 54.12                      | 52.78    | 2.54           | 0.469    |      |
|                          | shape PC5          | 59.48                      | 53.50    | 11.18          | 0.35     |      |
|                          | R/G                | 51.55                      | 53.71    | -4.02          | 0.595    |      |
|                          | B/Y                | 57.43                      | 52.47    | 9.45           | 0.314    |      |
|                          | luminance          | 58.21                      | 52.03    | 11.88          | 0.315    |      |
|                          | area               | 62.21                      | 52.88    | 17.65          | 0.186    |      |
|                          | top predictors     | shape PC5, luminance, area | 61.38    | 55.61          | 10.37    | 0.34 |
|                          | all sig predictors | none                       |          |                |          |      |

**Table S4.** Sex identity classification performance from eyebrow patches.

|                          |                | % correct            | % chance | % above chance | <i>P</i> |
|--------------------------|----------------|----------------------|----------|----------------|----------|
| <i>C. mona</i>           | shape PC1      | 52.89                | 52.69    | 0.39           | 0.547    |
| 13 individuals, 62 cases | shape PC2      | 62.86                | 50.61    | 24.21          | 0.183    |
|                          | shape PC3      | 71.11                | 52.75    | 34.79          | 0.071    |
|                          | shape PC4      | 53.57                | 52.04    | 2.94           | 0.527    |
|                          | shape PC5      | 56.71                | 52.31    | 8.42           | 0.424    |
|                          | R/G            | 58.50                | 54.21    | 7.91           | 0.373    |
|                          | B/Y            | 61.21                | 55.30    | 10.69          | 0.303    |
|                          | luminance      | 48.89                | 52.80    | -7.40          | 0.631    |
|                          | area           | 43.75                | 54.87    | -20.27         | 0.774    |
|                          | top predictors | shape PCs 2 & 3, B/Y | 62.71    | 55.91          | 12.17    |
| all sig predictors       | none           |                      |          |                |          |

**Table S5.** Age identity classification performance from eigenface scores.

|                          |                    | % correct          | % chance | % above chance | <i>P</i> |
|--------------------------|--------------------|--------------------|----------|----------------|----------|
| <i>C. mona</i>           | eigenface 1        | 40.36              | 53.69    | -24.83         | 0.766    |
| 13 individuals, 62 cases | eigenface 2        | 41.48              | 53.47    | -22.41         | 0.798    |
|                          | eigenface 3        | 72.21              | 52.89    | 36.52          | 0.103    |
|                          | eigenface 4        | 64.73              | 50.94    | 27.06          | 0.126    |
|                          | eigenface 5        | 56.27              | 52.20    | 7.80           | 0.411    |
|                          | top predictors     | eigenface 3, 4 & 5 | 68.64    | 54.98          | 24.84    |
|                          | all sig predictors | none               |          |                |          |
| <i>C. nictitans</i>      | eigenface 1        | 61.72              | 53.35    | 15.70          | 0.187    |
| 18 individuals, 84 cases | eigenface 2        | 54.31              | 51.40    | 5.64           | 0.382    |
|                          | eigenface 3        | 72.50              | 54.24    | 33.65          | 0.076    |
|                          | eigenface 4        | 47.36              | 52.63    | -10.00         | 0.647    |
|                          | eigenface 5        | 52.69              | 53.50    | -1.50          | 0.575    |
|                          | top predictors     | eigenface 1, 2 & 3 | 70.97    | 55.54          | 27.78    |
|                          | all sig predictors | none               |          |                |          |

**Table S6.** Age identity classification performance from nose-spots.

|                          |                | % correct                 | % chance | % above chance | <i>P</i> |       |
|--------------------------|----------------|---------------------------|----------|----------------|----------|-------|
| <i>C. nictitans</i>      | shape PC1      | 49.97                     | 51.96    | -3.83          | 0.634    |       |
| 18 individuals, 84 cases | shape PC2      | 45.72                     | 54.07    | -15.44         | 0.758    |       |
|                          | shape PC3      | 47.72                     | 50.91    | -6.26          | 0.612    |       |
|                          | shape PC4      | 50.78                     | 53.43    | -4.97          | 0.586    |       |
|                          | shape PC5      | 67.78                     | 53.40    | 26.92          | 0.086    |       |
|                          | R/G            | 57.75                     | 53.64    | 7.65           | 0.392    |       |
|                          | B/Y            | 49.81                     | 54.14    | -8.01          | 0.679    |       |
|                          | luminance      | 52.28                     | 51.79    | 0.94           | 0.502    |       |
|                          | area           | 52.19                     | 53.68    | -2.77          | 0.58     |       |
|                          | top predictors | shape PC5, R/G, luminance | 63.42    | 57.10          | 11.06    | 0.308 |
|                          |                | all sig predictors        | none     |                |          |       |

**Table S7.** Age identity classification performance from eyebrows.

|                          |                | % correct           | % chance | % above chance | <i>P</i> |       |
|--------------------------|----------------|---------------------|----------|----------------|----------|-------|
| <i>C. mona</i>           | shape PC1      | 47.15               | 52.40    | -10.02         | 0.576    |       |
| 13 individuals, 62 cases | shape PC2      | 53.59               | 50.17    | 6.82           | 0.4      |       |
|                          | shape PC3      | 60.29               | 52.41    | 15.04          | 0.315    |       |
|                          | shape PC4      | 50.44               | 52.12    | -3.21          | 0.521    |       |
|                          | shape PC5      | 39.65               | 51.29    | -22.70         | 0.733    |       |
|                          | R/G            | 67.15               | 53.22    | 26.17          | 0.172    |       |
|                          | B/Y            | 67.21               | 54.19    | 24.01          | 0.203    |       |
|                          | luminance      | 62.50               | 52.64    | 18.73          | 0.194    |       |
|                          | area           | 48.79               | 52.29    | -6.68          | 0.605    |       |
|                          | top predictors | R/G, B/Y, luminance | 64.88    | 56.84          | 14.15    | 0.251 |
|                          |                | all sig predictors  | none     |                |          |       |

**Table S8.** Individual identity classification performance from eigenface scores.

|                          |                    | % correct | % chance | % above chance | <i>P</i> |
|--------------------------|--------------------|-----------|----------|----------------|----------|
| <i>A. nigroviridis</i>   | eigenface 1        | 48.70     | 14.27    | 241.31         | 0.004    |
| 7 individuals, 45 cases  | eigenface 2        | 46.80     | 13.90    | 236.77         | 0.007    |
|                          | eigenface 3        | 49.30     | 14.78    | 233.57         | 0.01     |
|                          | eigenface 4        | 57.70     | 13.79    | 318.49         | 0.003    |
|                          | eigenface 5        | 60.80     | 13.98    | 334.88         | 0.001    |
| top predictors           | eigenface 1, 4 & 5 | 92.80     | 14.89    | 523.12         | 0.001    |
| all sig predictors       | eigenface 1 - 5    | 95.20     | 14.17    | 572.07         | 0.001    |
| <i>C. ascanius</i>       | eigenface 1        | 25.13     | 8.45     | 197.33         | 0.026    |
| 7 individuals, 36 cases  | eigenface 2        | 25.63     | 8.08     | 217.31         | 0.019    |
|                          | eigenface 3        | 5.13      | 7.86     | -34.76         | 0.481    |
|                          | eigenface 4        | 10.88     | 7.95     | 36.82          | 0.493    |
|                          | eigenface 5        | 20.00     | 8.66     | 131.01         | 0.153    |
| top predictors           | eigenface 1, 2 & 5 | 53.88     | 8.65     | 522.55         | 0.001    |
| all sig predictors       | eigenface 1 & 2    | 47.50     | 8.40     | 465.64         | 0.003    |
| <i>C. diana</i>          | eigenface 1        | 6.00      | 24.79    | -75.80         | 0.701    |
| 4 individuals, 26 cases  | eigenface 2        | 7.00      | 23.86    | -70.66         | 0.683    |
|                          | eigenface 3        | 8.83      | 24.71    | -64.25         | 0.673    |
|                          | eigenface 4        | 68.17     | 25.05    | 172.11         | 0.027    |
|                          | eigenface 5        | 33.67     | 24.70    | 36.30          | 0.22     |
| top predictors           | eigenface 4 & 5    | 61.00     | 24.64    | 147.52         | 0.053    |
| all sig predictors       | eigenface 4        | 68.17     | 25.05    | 172.11         | 0.027    |
| <i>C. mitis</i>          | eigenface 1        | 92.83     | 34.71    | 167.46         | 0.007    |
| 3 individuals, 30 cases  | eigenface 2        | 64.67     | 32.20    | 100.84         | 0.204    |
|                          | eigenface 1 & 2    | 100.00    | 33.45    | 198.95         | 0.009    |
|                          | eigenface 1        | 92.83     | 34.71    | 167.46         | 0.007    |
| <i>C. mona</i>           | eigenface 1        | 31.47     | 8.04     | 291.14         | 0.004    |
| 13 individuals, 62 cases | eigenface 2        | 19.67     | 7.83     | 151.29         | 0.095    |
|                          | eigenface 3        | 19.47     | 7.88     | 147.06         | 0.101    |
|                          | eigenface 4        | 14.00     | 7.31     | 91.41          | 0.086    |
|                          | eigenface 5        | 20.40     | 7.71     | 164.46         | 0.011    |
| top predictors           | eigenface 1, 2 & 5 | 42.13     | 7.90     | 433.64         | 0.001    |
| all sig predictors       | eigenface 1 & 5    | 35.67     | 8.28     | 330.64         | 0.001    |
| <i>C. neglectus</i>      | eigenface 1        | 8.00      | 24.96    | -67.95         | 0.439    |
| 4 individuals, 22 cases  | eigenface 2        | 50.00     | 25.55    | 95.69          | 0.448    |
|                          | eigenface 3        | 71.50     | 23.72    | 201.41         | 0.043    |
|                          | eigenface 4        | 55.50     | 24.41    | 127.41         | 0.05     |
|                          | eigenface 5        | 50.50     | 24.05    | 109.97         | 0.047    |
| top predictors           | eigenface 3, 4 & 5 | 75.00     | 23.88    | 214.14         | 0.047    |
| all sig predictors       | eigenface 3, 4 & 5 | 75.00     | 23.88    | 214.14         | 0.047    |
| <i>C. nictitans</i>      | eigenface 1        | 15.13     | 6.82     | 121.73         | 0.092    |
| 11 individuals, 60 cases | eigenface 2        | 3.94      | 6.95     | -43.38         | 0.701    |
|                          | eigenface 3        | 15.81     | 6.62     | 139.01         | 0.083    |
|                          | eigenface 4        | 9.94      | 6.48     | 53.39          | 0.283    |
|                          | eigenface 5        | 14.06     | 6.23     | 125.62         | 0.06     |
| top predictors           | eigenface 1, 3 & 5 | 31.31     | 6.51     | 60.83          | 0.001    |
| all sig predictors       | eigenface 1, 3 & 5 | 31.31     | 6.51     | 60.83          | 0.001    |

Table S8 continued.

|                         |                    | % correct          | % chance | % above chance | <i>P</i> |
|-------------------------|--------------------|--------------------|----------|----------------|----------|
| <i>C. petaurista</i>    | eigenface 1        | 75.71              | 24.36    | 210.80         | 0.009    |
| 4 individuals, 27 cases | eigenface 2        | 83.29              | 24.87    | 234.90         | 0.01     |
|                         | eigenface 3        | 16.00              | 24.52    | -34.74         | 0.499    |
|                         | eigenface 4        | 31.14              | 25.05    | 24.35          | 0.318    |
|                         | eigenface 5        | 37.71              | 24.37    | 54.78          | 0.279    |
|                         | top predictors     | eigenface 1, 2 & 5 | 96.29    | 26.34          | 265.56   |
| all sig predictors      | eigenface 1 & 2    | 88.14              | 24.53    | 259.31         | 0.001    |
| <i>C. sclateri</i>      | eigenface 1        | 59.89              | 16.57    | 261.41         | 0.004    |
| 6 individuals, 39 cases | eigenface 2        | 32.89              | 16.52    | 99.06          | 0.18     |
|                         | eigenface 3        | 67.44              | 16.50    | 308.73         | 0.001    |
|                         | eigenface 4        | 38.78              | 16.15    | 140.11         | 0.048    |
|                         | eigenface 5        | 42.33              | 16.86    | 151.02         | 0.055    |
|                         | top predictors     | eigenface 1, 3 & 5 | 76.67    | 16.79          | 356.68   |
| all sig predictors      | eigenface 1, 3 & 4 | 71.44              | 17.40    | 310.49         | 0.001    |
| <i>C. wolfi</i>         | eigenface 1        | 56.75              | 16.03    | 253.99         | 0.034    |
| 6 individuals, 34 cases | eigenface 2        | 59.25              | 16.71    | 254.59         | 0.026    |
|                         | eigenface 3        | 86.25              | 15.76    | 447.23         | 0.002    |
|                         | eigenface 4        | 30.00              | 17.43    | 72.12          | 0.166    |
|                         | eigenface 5        | 21.00              | 17.15    | 22.48          | 0.502    |
|                         | top predictors     | eigenface 1, 2 & 3 | 100.00   | 15.60          | 541.03   |
| all sig predictors      | eigenface 1, 2 & 3 | 100.00             | 15.60    | 541.03         | 0.001    |
| <i>E. patas</i>         | eigenface 1        | 68.50              | 32.32    | 111.95         | 0.148    |
| 3 individuals, 17 cases | eigenface 2        | 98.50              | 34.70    | 183.87         | 0.156    |
|                         | eigenface 3        | 100.00             | 31.15    | 221.03         | 0.118    |
|                         | top predictors     | eigenface 1, 2 & 3 | 100.00   | 35.05          | 185.31   |
| all sig predictors      | none               |                    |          |                |          |

**Table S9.** Individual identity classification performance from nose-spots.

|                          |                    | % correct             | % chance | % above chance | <i>P</i> |       |
|--------------------------|--------------------|-----------------------|----------|----------------|----------|-------|
| <i>C. ascanius</i>       | shape PC1          | 19.00                 | 8.19     | 131.88         | 0.135    |       |
| 7 individuals, 36 cases  | shape PC2          | 11.25                 | 8.82     | 27.50          | 0.512    |       |
|                          | shape PC3          | 3.38                  | 8.10     | -58.35         | 0.482    |       |
|                          | shape PC4          | 13.63                 | 8.25     | 65.13          | 0.132    |       |
|                          | shape PC5          | 14.13                 | 7.84     | 80.19          | 0.121    |       |
|                          | R/G                | 34.25                 | 8.26     | 314.69         | 0.016    |       |
|                          | B/Y                | 11.50                 | 8.15     | 41.12          | 0.498    |       |
|                          | luminance          | 14.88                 | 7.85     | 89.43          | 0.129    |       |
|                          | area               | 17.75                 | 8.27     | 114.69         | 0.129    |       |
|                          | top predictors     | shape PC 1, R/G, area | 52.00    | 15.25          | 240.94   | 0.153 |
|                          | all sig predictors | R/G                   | 34.25    | 8.26           | 314.69   | 0.016 |
| <i>C. nictitans</i>      | shape PC1          | 10.00                 | 9.21     | 8.58           | 0.383    |       |
| 11 individuals, 60 cases | shape PC2          | 16.00                 | 9.60     | 66.74          | 0.393    |       |
|                          | shape PC3          | 9.80                  | 8.83     | 10.99          | 0.374    |       |
|                          | shape PC4          | 11.40                 | 9.17     | 24.30          | 0.376    |       |
|                          | shape PC5          | 31.20                 | 9.59     | 225.30         | 0.046    |       |
|                          | R/G                | 12.60                 | 9.15     | 37.67          | 0.388    |       |
|                          | B/Y                | 5.40                  | 9.33     | -42.09         | 0.382    |       |
|                          | luminance          | 7.00                  | 8.95     | -21.76         | 0.378    |       |
|                          | area               | 21.40                 | 9.32     | 129.58         | 0.048    |       |
|                          | top predictors     | shape PCs 2 & 5, area | 35.00    | 8.76           | 299.77   | 0.06  |
|                          | all sig predictors | shape PC5, area       | 39.40    | 9.30           | 225.30   | 0.035 |
| <i>C. petaurista</i>     | shape PC1          | 45.43                 | 24.27    | 87.15          | 0.106    |       |
| 4 individuals, 27 cases  | shape PC2          | 87.86                 | 25.33    | 246.84         | 0.001    |       |
|                          | shape PC3          | 39.00                 | 24.71    | 57.83          | 0.254    |       |
|                          | shape PC4          | 69.86                 | 24.43    | 185.98         | 0.038    |       |
|                          | shape PC5          | 50.71                 | 24.18    | 109.74         | 0.125    |       |
|                          | R/G                | 55.71                 | 25.43    | 119.11         | 0.157    |       |
|                          | B/Y                | 23.57                 | 24.78    | -4.88          | 0.508    |       |
|                          | luminance          | 28.43                 | 24.51    | 15.97          | 0.512    |       |
|                          | area               | 31.86                 | 25.66    | 24.15          | 0.315    |       |
|                          | top predictors     | shape PCs 2 & 4, R/G  | 100.00   | 25.06          | 299.09   | 0.001 |
|                          | all sig predictors | shape PCs 2 & 4       | 85.57    | 25.09          | 241.12   | 0.004 |
| <i>C. sclateri</i>       | shape PC1          | 17.20                 | 19.90    | -13.56         | 0.7      |       |
| 5 individuals, 30 cases  | shape PC2          | 37.25                 | 20.06    | 85.67          | 0.177    |       |
|                          | shape PC3          | 16.40                 | 20.66    | -20.61         | 0.713    |       |
|                          | shape PC4          | 9.60                  | 20.11    | -52.26         | 0.707    |       |
|                          | shape PC5          | 22.00                 | 20.62    | 6.68           | 0.262    |       |
|                          | R/G                | 51.60                 | 19.51    | 164.46         | 0.049    |       |
|                          | B/Y                | 64.00                 | 19.50    | 228.14         | 0.006    |       |
|                          | luminance          | 10.80                 | 20.83    | -48.15         | 0.691    |       |
|                          | area               | 24.20                 | 20.02    | 20.85          | 0.266    |       |
|                          | top predictors     | shape PC 2, R/G, B/Y  | 63.50    | 18.06          | 251.54   | 0.009 |
|                          | all sig predictors | R/G, B/Y              | 63.60    | 20.68          | 207.49   | 0.011 |

**Table S10.** Individual identity classification performance from eyebrow patches.

|                          |                            | % correct | % chance | % above chance | <i>P</i> |
|--------------------------|----------------------------|-----------|----------|----------------|----------|
| <i>C. diana</i>          | shape PC1                  | 20.17     | 26.04    | -22.55         | 0.448    |
| 4 individuals, 26 cases  | shape PC2                  | 37.17     | 25.14    | 47.86          | 0.244    |
|                          | shape PC3                  | 2.67      | 23.79    | -88.79         | 0.519    |
|                          | shape PC4                  | 23.33     | 25.66    | -9.06          | 0.434    |
|                          | shape PC5                  | 20.33     | 25.95    | -21.66         | 0.463    |
|                          | R/G                        | 21.00     | 24.74    | -15.11         | 0.416    |
|                          | B/Y                        | 27.83     | 24.39    | 14.10          | 0.416    |
|                          | luminance                  | 89.00     | 24.46    | 263.92         | 0.002    |
|                          | area                       | 32.50     | 23.83    | 36.37          | 0.412    |
| top predictors           | shape PCs 2 & 5, luminance | 60.67     | 23.89    | 153.94         | 0.063    |
| all sig predictors       | luminance                  | 89.00     | 24.46    | 263.92         | 0.002    |
| <i>C. mona</i>           | shape PC1                  | 14.69     | 7.80     | 88.25          | 0.120    |
| 12 individuals, 64 cases | shape PC2                  | 15.50     | 7.59     | 104.20         | 0.105    |
|                          | shape PC3                  | 14.19     | 7.57     | 87.41          | 0.104    |
|                          | shape PC4                  | 10.88     | 7.50     | 44.91          | 0.331    |
|                          | shape PC5                  | 12.88     | 8.14     | 58.21          | 0.136    |
|                          | R/G                        | 17.44     | 7.39     | 135.88         | 0.095    |
|                          | B/Y                        | 23.19     | 7.54     | 207.70         | 0.026    |
|                          | luminance                  | 16.75     | 7.43     | 125.46         | 0.095    |
|                          | area                       | 15.88     | 7.55     | 110.17         | 0.112    |
| top predictors           | shape PCs 1 & 5, B/Y       | 58.25     | 9.13     | 537.78         | 0.003    |
| all sig predictors       | B/Y                        | 23.19     | 7.54     | 207.70         | 0.026    |
| <i>C. neglectus</i>      | shape PC1                  | 42.50     | 24.94    | 70.39          | 0.441    |
| 4 individuals, 22 cases  | shape PC2                  | 25.00     | 22.68    | 10.25          | 0.416    |
|                          | shape PC3                  | 50.50     | 25.30    | 99.60          | 0.055    |
|                          | shape PC4                  | 70.50     | 24.57    | 186.93         | 0.057    |
|                          | shape PC5                  | 37.50     | 26.39    | 42.11          | 0.466    |
|                          | R/G                        | 53.50     | 24.30    | 120.13         | 0.046    |
|                          | B/Y                        | 57.50     | 24.91    | 130.85         | 0.049    |
|                          | luminance                  | 26.00     | 24.63    | 5.58           | 0.441    |
|                          | area                       | 58.50     | 23.56    | 148.32         | 0.042    |
| top predictors           | R/G, B/Y, area             | 67.50     | 24.02    | 181.05         | 0.049    |
| all sig predictors       | R/G, B/Y, area             | 60.00     | 24.26    | 147.32         | 0.044    |
| <i>C. wolfi</i>          | shape PC1                  | 8.00      | 16.38    | -51.17         | 0.448    |
| 6 individuals, 34 cases  | shape PC2                  | 9.25      | 16.43    | -43.72         | 0.412    |
|                          | shape PC3                  | 26.25     | 16.95    | 54.86          | 0.156    |
|                          | shape PC4                  | 17.75     | 16.82    | 5.54           | 0.495    |
|                          | shape PC5                  | 30.50     | 17.33    | 75.99          | 0.147    |
|                          | R/G                        | 51.50     | 16.88    | 205.16         | 0.032    |
|                          | B/Y                        | 42.50     | 16.72    | 154.22         | 0.157    |
|                          | luminance                  | 53.00     | 16.38    | 223.60         | 0.024    |
|                          | area                       | 10.00     | 16.71    | -40.16         | 0.464    |
| top predictors           | shape PC1, R/G, luminance  | 53.25     | 17.05    | 212.26         | 0.023    |
| all sig predictors       | R/G, luminance             | 63.00     | 16.38    | 284.66         | 0.014    |
